# Supplementary material for: Upconversion luminescence nanoparticles-based lateral flow immunochromatographic assay for cephalexin detection
Source: Royal Society of Chemistry journal article supplement (doi:10.1039/c4tc02034k), 2014-01-01
Supplement: c4tc02034k1.pdf [file c4tc02034k1.pdf]

# Upconversion Luminescence Nanoparticles-Based Lateral Flow Immunochromatographic Assay for Cephalexin Detection

Chunyan Liu,<sup>a</sup> Wei Ma,<sup>b</sup> Zhenyu Gao,<sup>c</sup> Jiayi Huang,<sup>a</sup> Yi Hou,<sup>a</sup> Chuanlai Xu,<sup>b</sup> Wensheng Yang,<sup>c</sup> and Mingyuan Gao<sup>\*a</sup>

*Received (in XXX, XXX) Xth XXXXXXXXXX 20XX, Accepted Xth XXXXXXXXXX 20XX*

DOI: 10.1039/b000000x

<sup>a</sup>*Institute of Chemistry, Chinese Academy of Sciences, Bei Yi Jie 2, Zhong Guan Cun, Beijing 100190, China Fax: +86 10 8261 3214; E-mail: gaomy@iccas.ac.cn.*

<sup>b</sup>*School of Food Science and Technology, Jiangnan University, Lihu Road 1800, Wuxi, Jiangsu Province, 214122, China*

<sup>c</sup>*College of Chemistry, Jilin University, Changchun 130012, China*

**The supplementary information**

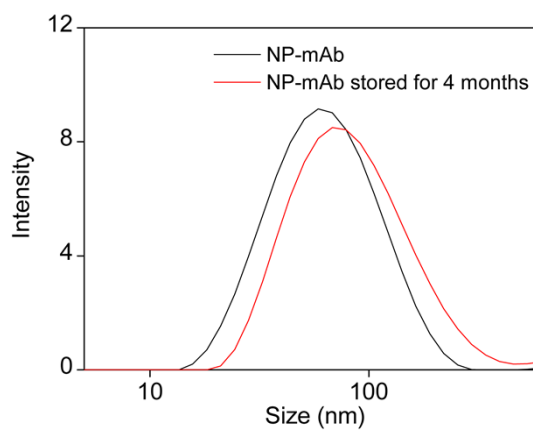

Fig S1: The hydrodynamic size profiles of the UCL particle-mAb (NP-mAb) conjugate.

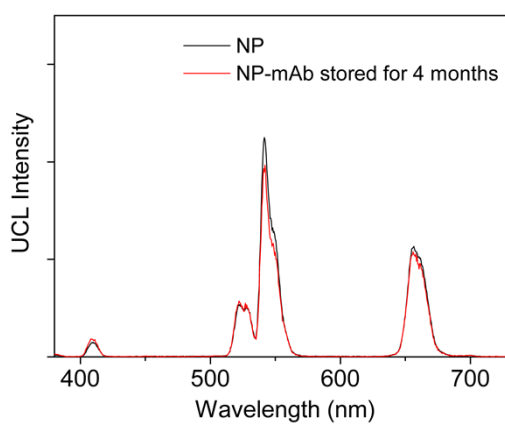

Fig S2: The luminescence spectra of the UCL nanoparticle (NP) and UCL particle-mAb (NP-mAb) conjugate.
